# Supplementary material
Source: Royal Society of Chemistry journal article supplement (doi:10.1039/d6cc01018k)
Supplement: d6cc01018k1.pdf [file d6cc01018k1.pdf]

## Supporting Information

Qing-Xue Ma,<sup>a</sup> Cong-Cong Shu,<sup>b</sup> Jiao-Yang Qiao,<sup>a</sup> Cai-Xia Dong,<sup>\*c</sup> and Zhong-Ming Sun<sup>\*a</sup>

<sup>a</sup> State Key Laboratory of Elemento-Organic Chemistry, Tianjin Key Lab of Rare Earth Materials and Applications, School of Materials Science and Engineering, Nankai University, Tianjin 300350, China. E-mail: sunlab@nankai.edu.cn

<sup>b</sup> Department of Chemistry and Research Center for Chemical Biology and Omics Analysis, College of Science, Southern University of Science and Technology, Shenzhen 518055, China.

<sup>c</sup> College of Resources and Environmental Engineering, Inner Mongolia University of Technology, Hohhot, China. E-mail: dongcx@imut.edu.cn

### Table of Contents

|                                                            |   |
|------------------------------------------------------------|---|
| <b>Supporting Information</b> .....                        | 1 |
| <b>1. Experimental Procedures</b> .....                    | 2 |
| <b>2. Crystallographic Supplementary Information</b> ..... | 2 |
| <b>3. ESI-MS Studies</b> .....                             | 5 |
| <b>4. EDX Studies</b> .....                                | 6 |
| <b>5. Control Experiments</b> .....                        | 6 |
| <b>6. Computational Details</b> .....                      | 6 |
| <b>References</b> .....                                    | 9 |

## 1. Experimental Procedures

All manipulations and reactions were performed under a nitrogen atmosphere using standard Schlenk or glovebox techniques. Ethylenediamine (en) (Aldrich, 99%) was freshly distilled by  $\text{CaH}_2$  prior to use. The solvent toluene (tol) (Aldrich, 99.8%) was freshly distilled from sodium-benzophenone. Acetonitrile (Aldrich, 99.8%) was distilled from  $\text{CaH}_2$  under  $\text{N}_2$  and stored under nitrogen prior to use. 4,7,13,16,21,24-Hexaoxa-1,10-diazabicyclo[8.8.8]hexacosane ([2.2.2]-crypt, Sigma-Aldrich 98%) was dried under a vacuum for 12 hours prior to use.  $\text{K}_4\text{Pb}_9$  was synthesized by heating a stoichiometric mixture of corresponding elements at 800 °C for two days in niobium tubes. (1,3-Bis(2,6-diisopropylphenyl)-1*H*-imidazol-2(3*H*)-ylidene)silver chloride was prepared according to modified literature procedures.<sup>[1]</sup> Chloro(triphenylphosphine)silver was prepared according to modified literature procedures.<sup>[2]</sup> Chloro(1,3-dimesitylimidazol-2-ylidene)copper(I) and 1,3-Bis(2,6-diisopropylphenyl)-2,3-dihydro-2-imidazolyl]copper(I) Chloride were purchased from Aldrich.

### Synthesis of $[\text{K}([2.2.2]\text{crypt})]_3[\text{Ag}@\text{Pb}_{12}]\cdot\text{tol}$ (**1**)

In a 10 ml vial,  $\text{K}_4\text{Pb}_9$  (202 mg, 0.1 mmol) and 2.2.2-crypt (150 mg, 0.4 mmol) were dissolved in 3.0 ml en and stirred at room temperature for 0.5 h to yield a black–brown solution. (1,3-Bis(2,6-diisopropylphenyl)-1*H*-imidazol-2(3*H*)-ylidene)silver chloride (11.4 mg, 0.05 mmol) was added slowly to this mixture over 0.5 h and then stirred vigorously for 3.0 h. The mixture was centrifuged and the liquid supernatant transferred to a test tube, then carefully layered with toluene (3.0 ml) to allow for crystallization. After 5 days, block-like crystals of **1** were observed in the test tube with a yield of ~24% (based on Ag).

### X-ray Diffraction:

The single crystal diffraction data was collected on Rigaku XtalAB PRO MM007 DW at 100 K, with a Hybrid Pixel Array CCD Detector. The X-ray source is Mo  $\text{K}\alpha$  ( $\lambda = 0.7107 \text{ \AA}$ ). The raw diffraction data was collected and reduced by the program of “CrysAlisPro 1.171.40.84a (Rigaku OD, 2020)”, and treated by multi-scan absorption correction. Using direct methods, we solved the structures and refined them to convergence using SHELXL-2014 and Olex2.<sup>[3-5]</sup> Non-hydrogen atoms were refined anisotropically, except for those in split positions, while all hydrogen atoms of organic groups were placed rationally using geometrical considerations.

### Electrospray Ionization Mass Spectrometry (ESI-MS) Investigations:

ESI-MS analysis was conducted using an Agilent Technologies ESI-TOF-MS (6230) on an LTQ linear ion trap spectrometer. The spray voltage and capillary voltage were set to 5.48 kV and 30 V, respectively, while the capillary temperature was maintained at 300 °C.

### Energy Dispersive X-ray (EDX) Spectroscopic Analysis:

We conducted EDX analysis with a scanning electron microscope (FE-SEM, JEOL JSM-7800F, Japan), using an acceleration voltage of 20 kV and an accumulation time of 150 s for data acquisition.

## 2. Crystallographic Supplementary Information

### 2.1 General

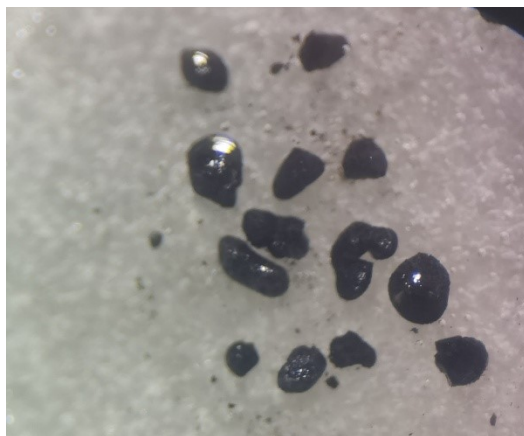

**Figure S1.** Block-like crystals for  $[\text{K}([2.2.2]\text{crypt})]_3[\text{Ag}@\text{Pb}_{12}]\cdot\text{tol}$  (**1**) dispersed in silicon oil.

**Table S1.** X-ray measurements and structure solutions of **[K([2.2.2]crypt)]<sub>3</sub>[Ag@Pb<sub>12</sub>]·tol (1)**.

| compound                                              | <b>1</b>                                                                                          |
|-------------------------------------------------------|---------------------------------------------------------------------------------------------------|
| Empirical formula                                     | C <sub>75</sub> H <sub>132</sub> AgK <sub>3</sub> N <sub>6</sub> O <sub>18</sub> Pb <sub>12</sub> |
| Formula weight                                        | 4117.31                                                                                           |
| Temperature/K                                         | 100.00(10)                                                                                        |
| Crystal system                                        | trigonal                                                                                          |
| Space group                                           | <i>R</i> -3                                                                                       |
| <i>a</i> /Å                                           | 24.9000(3)                                                                                        |
| <i>b</i> /Å                                           | 24.9000(3)                                                                                        |
| <i>c</i> /Å                                           | 29.8591(4)                                                                                        |
| <i>α</i> /°                                           | 90                                                                                                |
| <i>β</i> /°                                           | 90                                                                                                |
| <i>γ</i> /°                                           | 120                                                                                               |
| Volume/Å <sup>3</sup>                                 | 16032.7(4)                                                                                        |
| <i>Z</i>                                              | 6                                                                                                 |
| $\rho_{\text{calc}}/\text{cm}^3$                      | 2.559                                                                                             |
| $\mu/\text{mm}^{-1}$                                  | 19.179                                                                                            |
| <i>F</i> (000)                                        | 10953.6                                                                                           |
| 2 $\theta$ range for data collection/                 | 4.02 to 68.14                                                                                     |
| Reflections collected/ unique                         | 25209                                                                                             |
| Data/restraints/parameters                            | 7563/0/348                                                                                        |
| Goodness-of-fit on <i>F</i> <sup>2</sup>              | 1.032                                                                                             |
| Final R indexes [ <i>I</i> ≥ 2 $\sigma$ ( <i>I</i> )] | <i>R</i> <sub>1</sub> = 0.0258, <i>wR</i> <sub>2</sub> =<br>0.0620                                |
| Final R indexes [all data]                            | <i>R</i> <sub>1</sub> = 0.0365, <i>wR</i> <sub>2</sub> = 0.0650                                   |
| Largest diff. peak/hole / e Å <sup>-3</sup>           | 2.86/-2.34                                                                                        |
| CCDC                                                  | 2526890                                                                                           |

<sup>a</sup>  $R_1 = \frac{\sum ||F_o| - |F_c||}{\sum |F_o|}$ ;  $wR_2 = \left\{ \frac{\sum w[(F_o)^2 - (F_c)^2]^2}{\sum w[(F_o)^2]^2} \right\}^{1/2}$

<sup>b</sup>  $\text{Goof} = \left\{ \frac{\sum w[(F_o)^2 - (F_c)^2]^2}{(n-p)} \right\}^{1/2}$

## 2.2 Details of structure

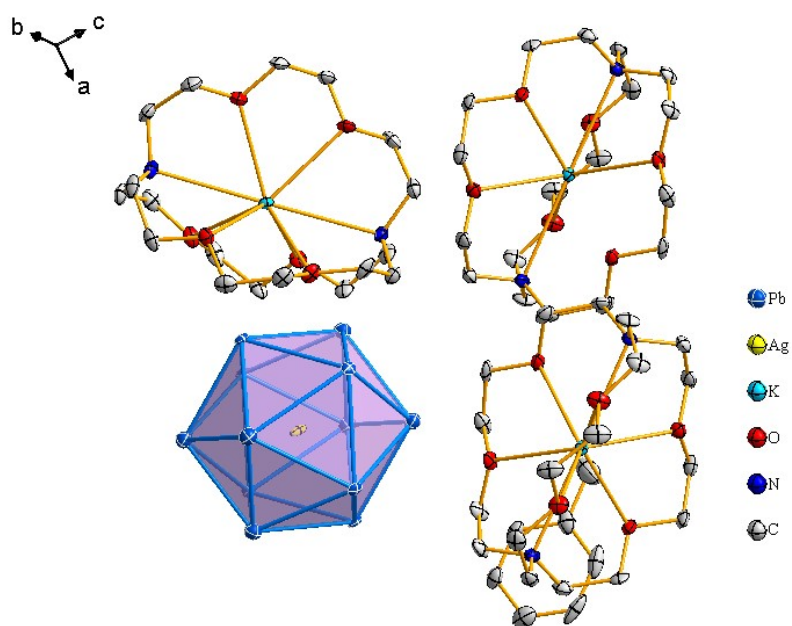

**Figure S2.** Asymmetric unit of  $[\text{K}([2.2.2]\text{crypt})]_3[\text{Ag}@Pb_{12}]\cdot\text{tol}$  (1) with the cluster fragment. Thermal ellipsoids are drawn at 50% probability. Hydrogen atoms are omitted for clarity.

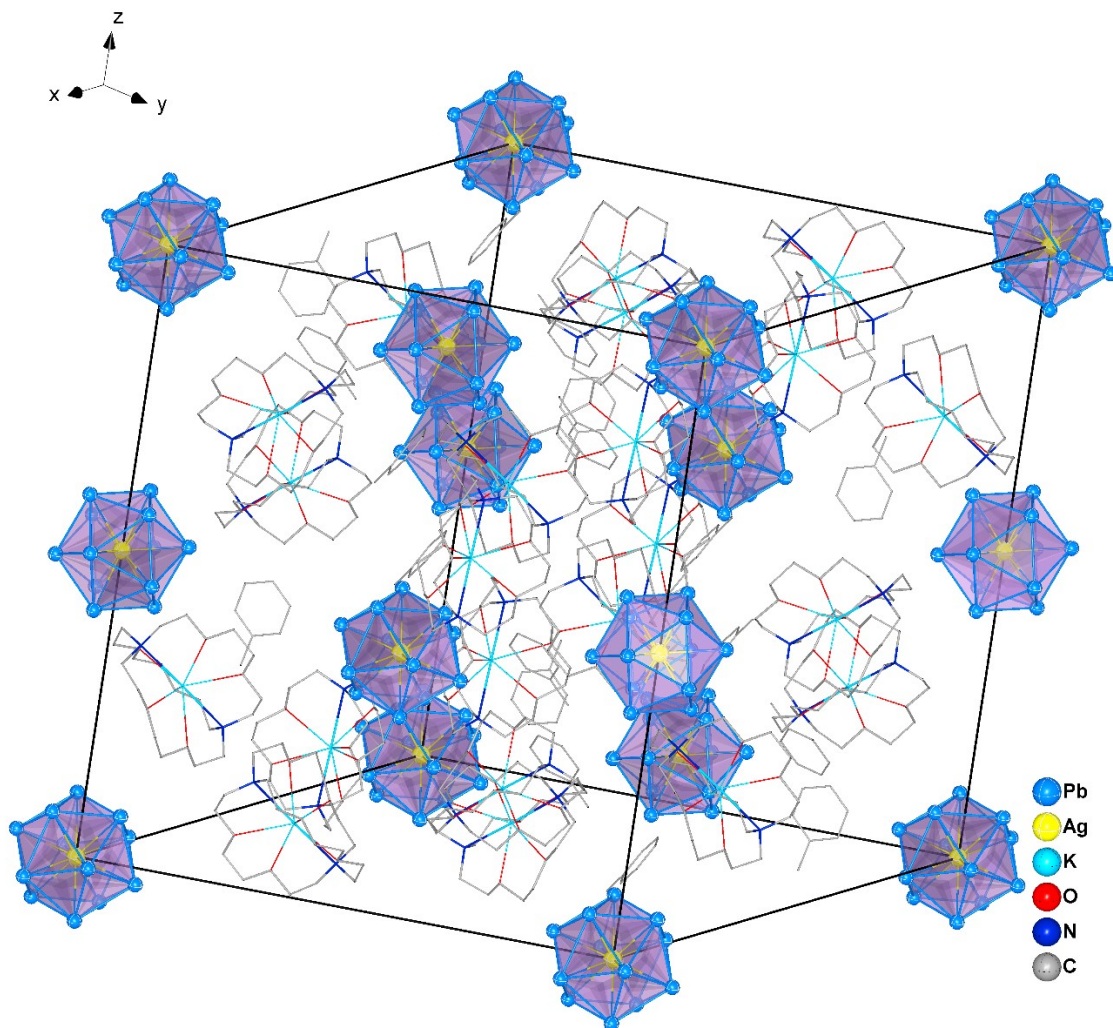

**Figure S3.** Unit cell of  $[\text{K}([2.2.2]\text{crypt})]_3[\text{Ag}@Pb_{12}]_2\cdot\text{tol}$  (1). The disorder positions (atoms and bonds) and H atoms in the cluster are omitted for clarity.

## 2. ESI-MS Studies

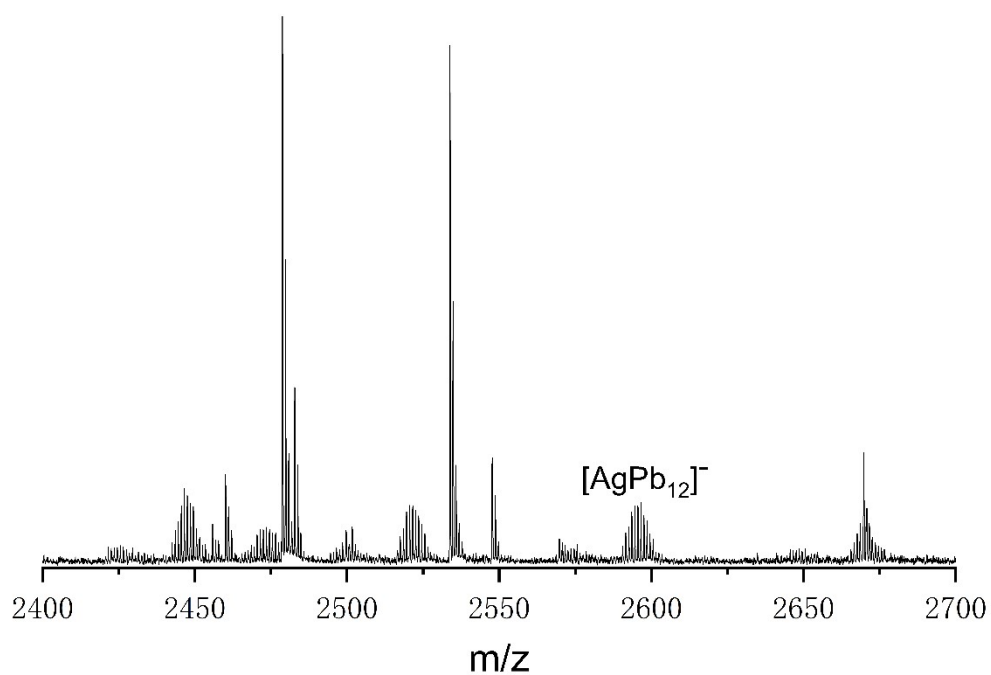

**Figure S4.** Overview of ESI-MS in negative ion mode of a freshly dissolved crystalline sample of **1** in acetonitrile.

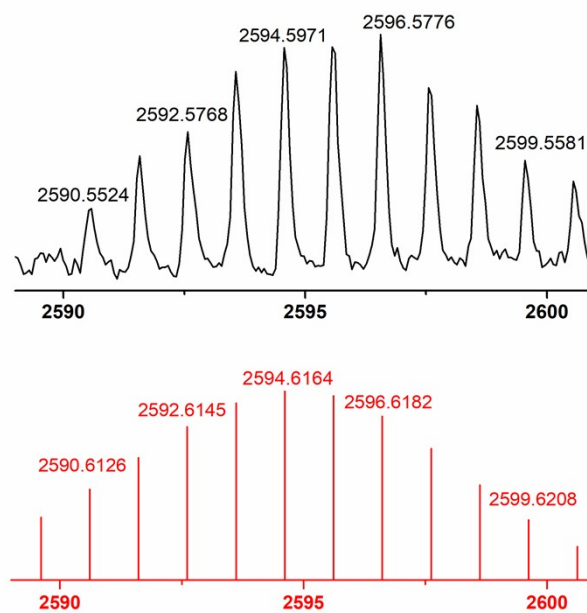

**Figure S5.** Measured (black) and simulated (red) spectra of the fragment [AgPb<sub>12</sub>]<sup>-</sup>.

### 3. EDX Studies

EDX analysis was carried out on **1** using a scanning electron microscope (FE-SEM, JEOL JSM-7800F, Japan). The acceleration voltage and accumulation time were 20 kV and 150 s, respectively. EDX analysis qualitatively confirms the presence of K, Ag, and Pb in the crystal of  $\text{K}([\text{2.2.2}]\text{crypt})_3[\text{Ag}@\text{Pb}_{12}]\cdot\text{tol}$  (**1**).

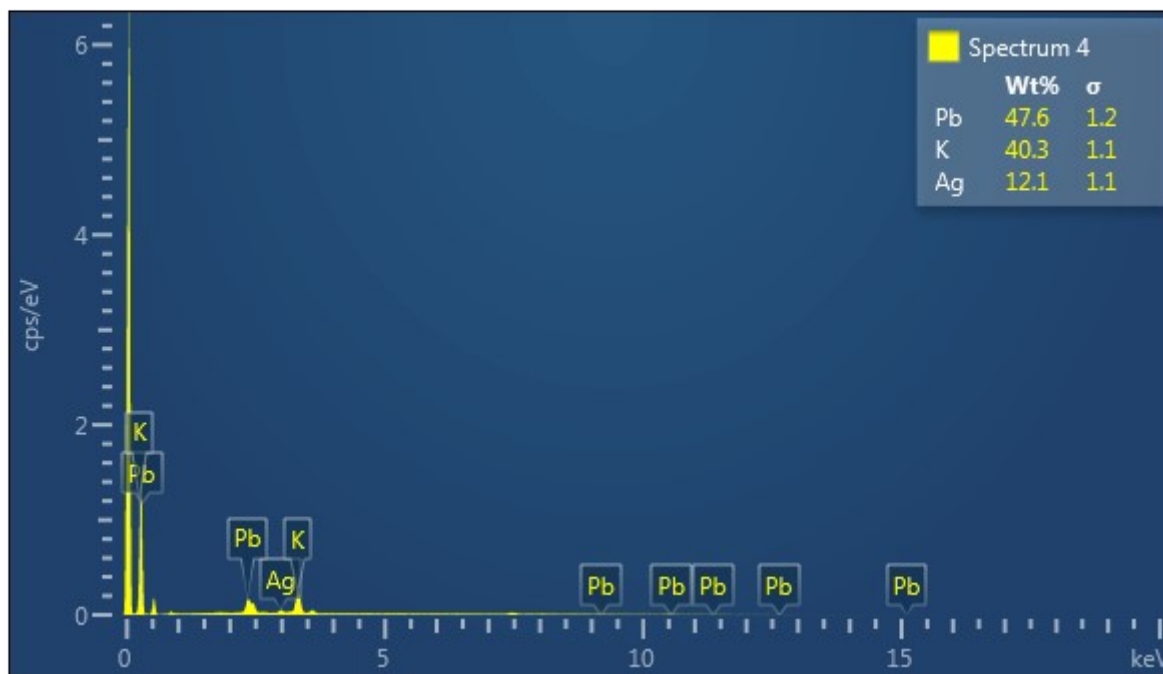

Figure S6. EDX analysis of complex  $\text{K}([\text{2.2.2}]\text{crypt})_3[\text{Ag}@\text{Pb}_{12}]\cdot\text{tol}$  (**1**).

### 4. Control Experiments

To investigate the role of the NHC ligand and the specificity of the metal center in the formation of the endohedral  $[\text{M}@\text{Pb}_{12}]^{3-}$  cluster, we performed a series of control experiments under reaction conditions analogous to those used for the successful isolation of  $[\text{Ag}@\text{Pb}_{12}]^{3-}$ .

#### 4.1 Attempted Synthesis Using a Phosphine-Stabilized Silver(I) Precursor

Reaction A: In a 10 ml vial,  $\text{K}_4\text{Pb}_9$  (202 mg, 0.1 mmol) and 2.2.2-crypt (150 mg, 0.4 mmol) were dissolved in 3.0 ml en and stirred at room temperature for 0.5 h to yield a black–brown solution. Chloro(triphenylphosphine)silver (20.3 mg, 0.05 mmol) was added slowly to this mixture over 0.5 h and then stirred vigorously for 3.0 h. The mixture was centrifuged and the liquid supernatant transferred to a test tube, then carefully layered with toluene (3.0 ml) to allow for crystallization. After 5 days, block-like crystals of  $[\text{K}([\text{2.2.2}]\text{crypt})_4][\text{Pb}_9]$  were observed in the test tub.

#### 4.2 Attempted Synthesis of the Copper Analogue $[\text{Cu}@\text{Pb}_{12}]^{3-}$

Reaction B: In a 10 ml vial,  $\text{K}_4\text{Pb}_9$  (202 mg, 0.1 mmol) and 2.2.2-crypt (150 mg, 0.4 mmol) were dissolved in 3.0 ml en and stirred at room temperature for 0.5 h to yield a black–brown solution. 1,3-Bis(2,6-diisopropylphenyl)-2,3-dihydro-2-imidazolyl]copper(I) Chloride (IPrCuCl) (24.4 mg, 0.05 mmol) was added slowly to this mixture over 0.5 h and then stirred vigorously for 3.0 h. The mixture was centrifuged and the liquid supernatant transferred to a test tube, then carefully layered with toluene (3.0 ml) to allow for crystallization. After 5 days, block-like crystals of  $[\text{K}([\text{2.2.2}]\text{crypt})_3][\text{Cu}@\text{Pb}_9]$  were observed in the test tub.

Reaction C: In a 10 ml vial,  $\text{K}_4\text{Pb}_9$  (202 mg, 0.1 mmol) and 2.2.2-crypt (150 mg, 0.4 mmol) were dissolved in 3.0 ml en and stirred at room temperature for 0.5 h to yield a black–brown solution. Chloro(1,3-dimesitylimidazol-2-ylidene)copper(I) (IMesCuCl) (20.1 mg, 0.05 mmol) was added slowly to this mixture over 0.5 h and then stirred vigorously for 3.0 h. The mixture was centrifuged and the liquid

supernatant transferred to a test tube, then carefully layered with toluene (3.0 ml) to allow for crystallization. The reaction using IMesCuCl yielded only an amorphous, mud-like solid from which no crystalline product could be isolated, despite repeated crystallization attempts.

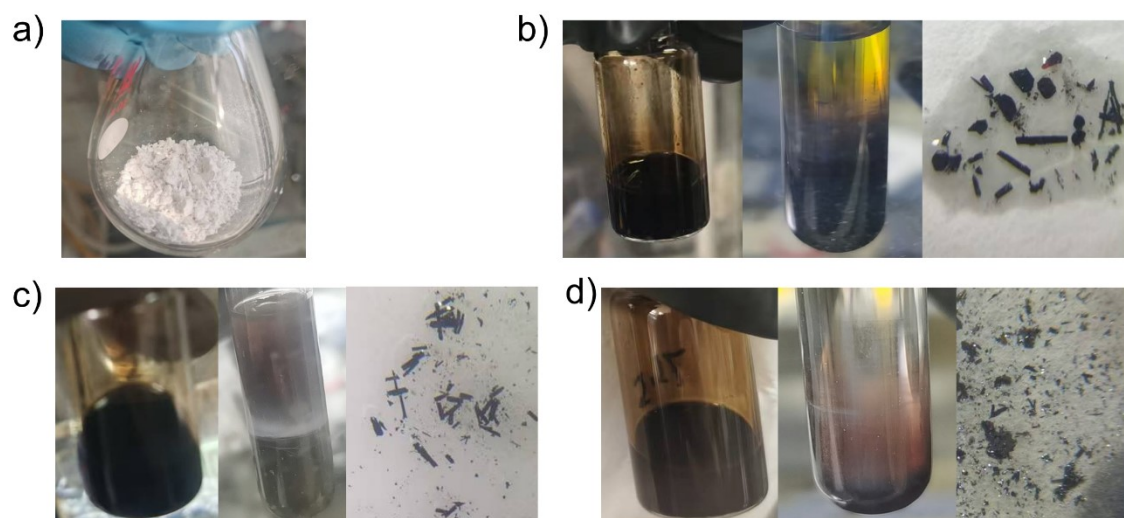

**Figure S7.** a) AgPPh<sub>3</sub>Cl b) reaction A and crystals of [K([2.2.2]crypt)]<sub>4</sub>[Pb<sub>9</sub>] c) reaction B and crystals of [K([2.2.2]crypt)]<sub>3</sub>[Cu@Pb<sub>9</sub>] c) reaction C and no crystalline product.

## 5. Computational Details

All quantum-chemical calculations were performed with Gaussian 09<sup>[6]</sup>. Geometry optimizations were carried out using the PBE0 hybrid functional<sup>[7]</sup> and the def2-TZVP basis set<sup>[8]</sup>, followed by subsequent electronic-structure calculations based on the optimized geometries. Harmonic vibrational frequency analyse was carried out for optimized ground-state structures to confirm its stability and to ensure that the structure corresponds to a true minimum on the potential energy surface (no imaginary frequencies). The solid-state confining effect of cations was simulated with the continuum solvent model (PCM) by setting the dielectric constant to  $\epsilon_r = 12.9$ . The resulting wavefunction-derived properties and visualization outputs were analyzed using Multiwfn (v3.8)<sup>[9, 10]</sup>, and molecular structures/orbitals were rendered with VMD (v1.9.3)<sup>[11]</sup>.

**Table S2.** Energy and Cartesian coordinates (in Å) for the optimized [Ag@Pb<sub>12</sub>]<sup>3-</sup> cluster.

| [Ag@Pb <sub>12</sub> ] <sup>3-</sup> |               | E: -67008.5014eV |               |
|--------------------------------------|---------------|------------------|---------------|
| Pb                                   | 1.8091868042  | 1.0445345295     | 2.3466088734  |
| Pb                                   | -0.0000000517 | 3.0373936709     | 0.7893861193  |
| Ag                                   | 0.0000000000  | 0.0000000000     | 0.0000000000  |
| Pb                                   | 2.6304601062  | -1.5186967907    | 0.7893861193  |
| Pb                                   | -1.8091868397 | 1.0445344679     | 2.3466088734  |
| Pb                                   | 0.0000000355  | -2.0890689973    | -0.7893861193 |
| Pb                                   | -2.6304601062 | 1.5186967907     | -0.7893861193 |
| Pb                                   | -0.0000000355 | 2.0890689973     | -2.3466088734 |
| Pb                                   | -1.8091868042 | -1.0445345295    | -2.3466088734 |
| Pb                                   | 1.8091868397  | -1.0445344679    | -2.3466088734 |
| Pb                                   | -2.6304600545 | -1.5186968802    | 0.7893861193  |
| Pb                                   | 0.0000000517  | -3.0373936709    | -0.7893861193 |
| Pb                                   | 1.8091868042  | 1.0445345295     | 2.3466088734  |

**Table S3.** NPA valence electron configurations, charge (a.u.) for the  $[\text{Ag@Pb}_{12}]^{3-}$  clusters.

| Species                    | Electron configuration                     | Charge (a.u.) |
|----------------------------|--------------------------------------------|---------------|
| $[\text{Ag@Pb}_{12}]^{3-}$ |                                            |               |
| Pb                         | $6s(1.75)6p(2.44)6d(0.02)7p(0.01)$         | -0.21         |
| Pb                         | $6s(1.74)6p(2.38)6d(0.02)7p(0.01)$         | -0.14         |
| Ag                         | $5s(0.43)4d(9.90)5p(1.53)6s(0.03)6p(0.01)$ | -0.91         |
| Pb                         | $6s(1.74)6p(2.38)6d(0.02)7p(0.01)$         | -0.14         |
| Pb                         | $6s(1.75)6p(2.44)6d(0.02)7p(0.01)$         | -0.21         |
| Pb                         | $6s(1.75)6p(2.44)6d(0.02)7p(0.01)$         | -0.21         |
| Pb                         | $6s(1.74)6p(2.38)6d(0.02)7p(0.01)$         | -0.14         |
| Pb                         | $6s(1.74)6p(2.38)6d(0.02)7p(0.01)$         | -0.14         |
| Pb                         | $6s(1.75)6p(2.44)6d(0.02)7p(0.01)$         | -0.21         |
| Pb                         | $6s(1.75)6p(2.44)6d(0.02)7p(0.01)$         | -0.21         |
| Pb                         | $6s(1.75)6p(2.44)6d(0.02)7p(0.01)$         | -0.21         |
| Pb                         | $6s(1.74)6p(2.38)6d(0.02)7p(0.01)$         | -0.14         |
| Pb                         | $6s(1.74)6p(2.38)6d(0.02)7p(0.01)$         | -0.14         |

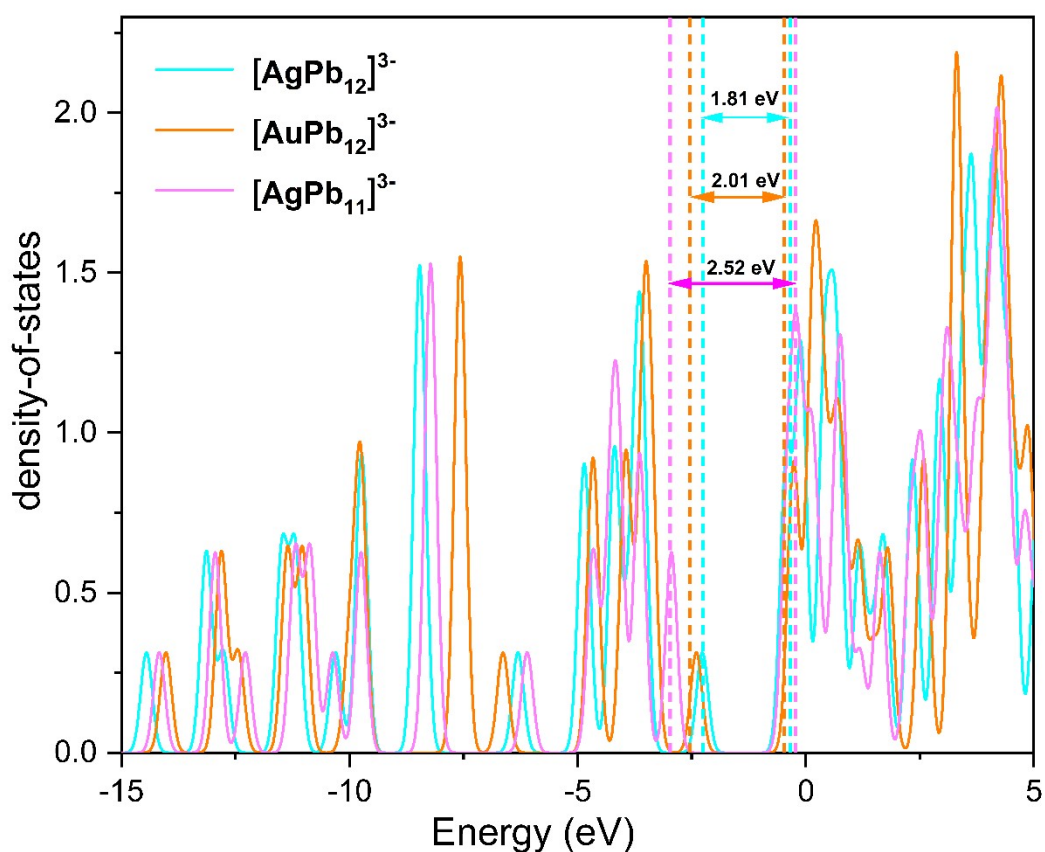

**Figure S8.** Total density of states (TDOS) for  $[\text{Ag@Pb}_{12}]^{3-}$  (blue),  $[\text{Au@Pb}_{12}]^{3-}$  (orange), and  $[\text{Ag@Pb}_{11}]^{3-}$  (pink). The Fermi level is at 0 eV.

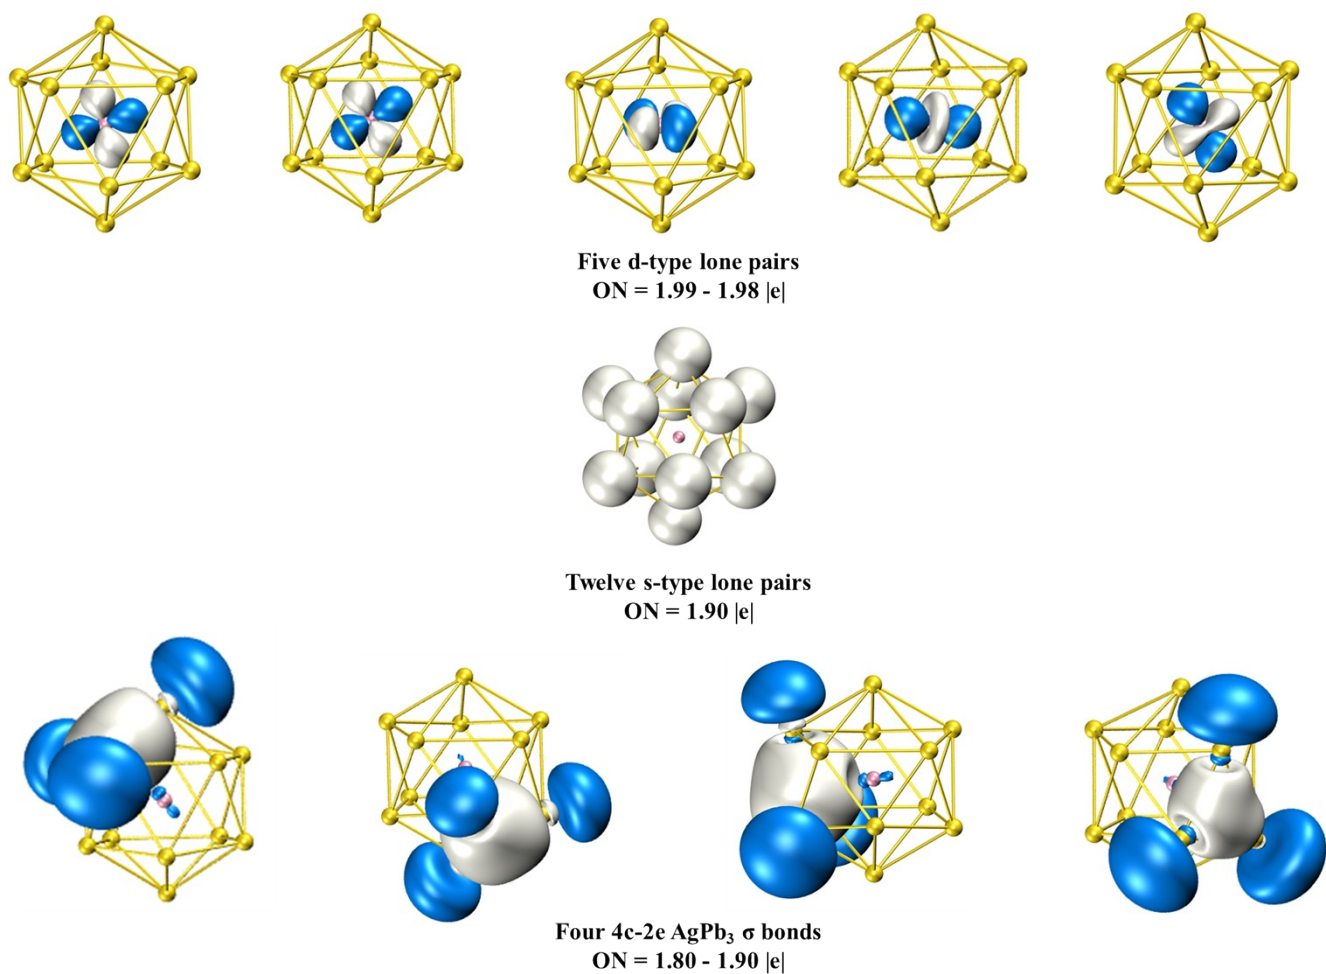

**Figure S9.** AdNDP analysis of  $[\text{Ag}@\text{Pb}_{12}]^{3-}$  cluster, ON represents occupancy number.

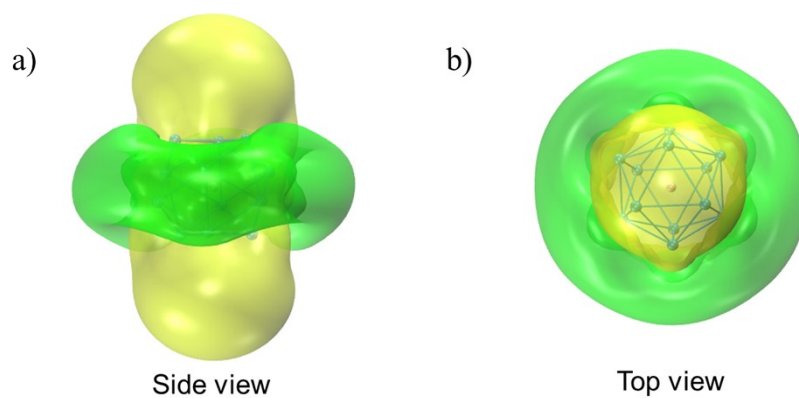

**Figure S10.** Iso-chemical shielding surface (ICSS) for  $[\text{Ag}@\text{Pb}_{12}]^{3-}$  cluster. (a) Side views and (b) top views, where the yellow and green regions correspond to negative and positive ICSS values.

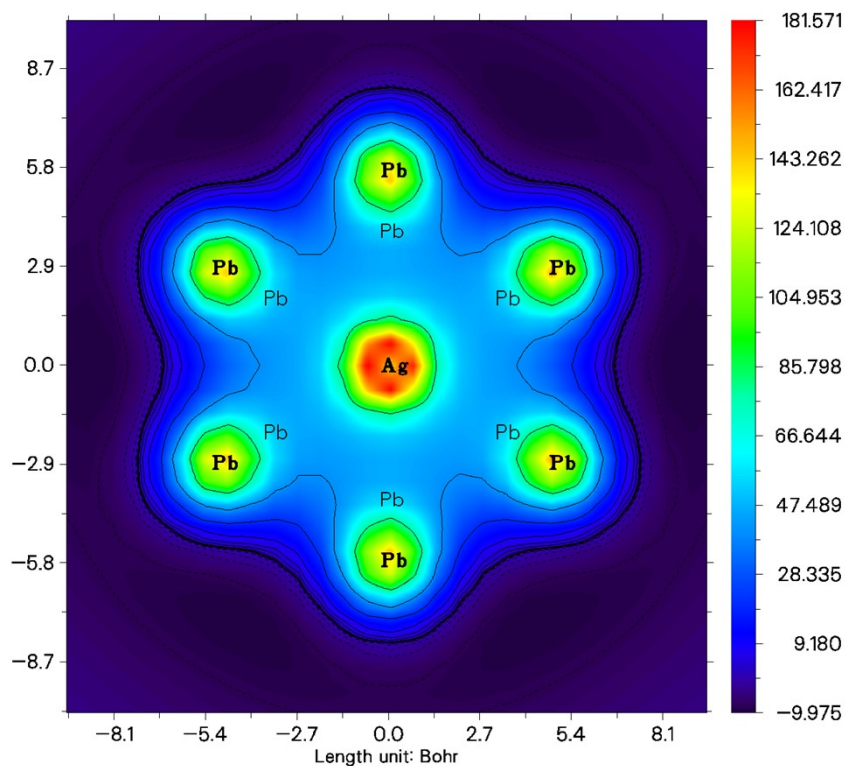

**Figure S11.** 2D ICSS contour map on the equatorial plane (through the central Ag atom), with shielding (red) and deshielding (blue) regions indicated.

## References

- [1] P. de Frémont, N.M. Scott, E.D. Stevens, et al., Synthesis of Well-Defined *N*-Heterocyclic Carbene Silver(I) Complexes. *Organometallics*, **2005**, *24*, 6301–6309.
- [2] M. Halim, R.D. Kennedy, M. Suzuki, S.I. Khan, P.L. Diaconescu, Y. Rubin, *J. Am. Chem. Soc.*, 2011, **133**, 6841-6851.
- [3] G. M. Sheldrick, SHELXT – Integrated space-group and crystal-structure determination. *Acta Crystallogr. Sect. A: Found. Adv.*, **2015**, *71*, 3-8.
- [4] O. V. Dolomanov, L. J. Bourhis, R. J. Gildea, J. A. K. Howard, H. Puschmann, OLEX2: A complete structure solution, refinement and analysis program. *J. Appl. Crystallogr.*, **2009**, *42*, 339-341.
- [5] A. L. Spek, Structure validation in chemical crystallography. *Acta Crystallogr. Sect. D: Biol. Crystallogr.*, **2009**, *65*, 148-155.
- [6] S. Grimme, S. Ehrlich, L. Effect of the Damping Function in Dispersion Corrected Density Functional Theory. Goerigk, *J. Comput. Chem.*, **2011**, *32*, 1456–1465.
- [7] C. Adamo, V. Barone, Toward reliable density functional methods without adjustable parameters: The PBE0 model, *J. Chem. Phys.* **1999**, *110*, 6158–6170.
- [8] Pritchard BP, Altarawy D, Didier B et al, New basis set exchange: an open, up-to-date resource for the molecular sciences community. *J Chem Inf Model.* **2019**. *59*, 4814–4820.
- [9] Lu, T.; Chen, F. Multiwfn: A multifunctional wavefunction analyzer. *J. Comput. Chem.* **2012**, *33*, 580–592.
- [10] Lu, T. A comprehensive electron wavefunction analysis toolbox for chemists, Multiwfn. *J. Comput. Chem.* **2024**, *161*, 082503.
- [11] Humphrey, W.; Dalke, A.; Schulten, K. VMD: Visual molecular dynamics. *J. Mol. Graph.* **1996**, *14*, 33–38.
